# Supplementary material
Source: HighWire-hosted journal article supplement (https://thorax.bmj.com/content/75/6/503)
Supplement: inline-supplementary-material-2 [file inline-supplementary-material-2.pdf]

**Appendix 2. Details of additional findings on CT of the abdomen and pelvis and their clinical significance**

| <b>Diagnosis</b><br><b>Radiological Finding</b>                                                                    | <b>Clinical Significance</b>                                                  |
|--------------------------------------------------------------------------------------------------------------------|-------------------------------------------------------------------------------|
| <b>Abdomen n=29 (11.6)</b>                                                                                         |                                                                               |
| <b>Lung Cancer n=16</b>                                                                                            |                                                                               |
| <b>Adenocarcinoma n=9</b>                                                                                          |                                                                               |
| Adrenal gland metastases (M)                                                                                       | Up-staging of disease                                                         |
| Liver metastases (F)                                                                                               | Up-staging of disease                                                         |
| Lumbar spine metastases (M)                                                                                        | Up-staging of disease                                                         |
| Adrenal Metastases and para-aortic lymphadenopathy (F)                                                             | Up-staging of disease                                                         |
| Para-aortic lymphadenopathy (F)                                                                                    | Up-staging of disease                                                         |
| Left Flank soft tissue metastatic deposit (M)                                                                      | Up-staging of disease and alternative convenient biopsy site                  |
| Liver and lumbar spine metastases (F)                                                                              | Up-staging of disease                                                         |
| Renal cancer (M)                                                                                                   | Synchronous primary malignancy                                                |
| Liver and small bowel metastases and para-aortic lymphadenopathy (M)                                               | Up-staging of disease                                                         |
| <b>Squamous Cell n=4</b>                                                                                           |                                                                               |
| Liver metastases (F)                                                                                               | Up-staging of disease                                                         |
| Liver metastases (M)                                                                                               | Up-staging of disease                                                         |
| Upper abdominal lymphadenopathy (M)                                                                                | Up-staging of disease                                                         |
| Lumbar Spine Metastases (M)                                                                                        | Up-staging of disease                                                         |
| <b>Small Cell n=3</b>                                                                                              |                                                                               |
| Para-aortic lymphadenopathy (M)                                                                                    | Up-staging of disease                                                         |
| Liver and Adrenal Metastases (M)                                                                                   | Up-staging of disease                                                         |
| Upper abdominal lymphadenopathy(F)                                                                                 | Up-staging of disease                                                         |
| <b>Mesothelioma n=1</b>                                                                                            |                                                                               |
| Renal cancer (M)                                                                                                   | Synchronous primary malignancy                                                |
| <b>Ovarian Cancer n=2</b>                                                                                          |                                                                               |
| Adrenal gland metastases (F)                                                                                       | Up-staging of disease                                                         |
| Large amount of intra-peritoneal free fluid (F)                                                                    | Significant contribution to diagnosis and alternative site for fluid analysis |
| <b>Lymphoma n=2</b>                                                                                                |                                                                               |
| Dense mesentery with lymphadenopathy and soft tissue mass infiltrating and wrapping around kidney (M) non hodgkins | Up-staging of disease and significant contribution to diagnosis               |
| Upper abdominal and para-aortic lymphadenopathy (M) follicular lymphoma                                            | Up-staging of disease                                                         |
| <b>Breast Cancer n=1</b>                                                                                           |                                                                               |
| Liver metastases (F)                                                                                               | Up-staging of disease                                                         |
| <b>Renal Cancer n=4</b>                                                                                            |                                                                               |
| Renal mass(M)                                                                                                      | Identification of primary tumour                                              |
| Renal mass(M)                                                                                                      | Identification of primary tumour                                              |
| Renal mass(M)                                                                                                      | Identification of primary tumour                                              |
| Renal mass(M)                                                                                                      | Identification of primary tumour                                              |
| <b>Colon Cancer n=1</b>                                                                                            |                                                                               |
| Mural thickening of caecum and proximal ascending colon, peritoneal thickening and ascites(M)                      | Identification of primary tumour                                              |

|                                                                                          |                                                                     |
|------------------------------------------------------------------------------------------|---------------------------------------------------------------------|
| <b>Liver Cancer n=1</b>                                                                  |                                                                     |
| <i>Liver mass(M)</i>                                                                     | <i>Identification of primary tumour</i>                             |
| <b>Pancreatitis n=1</b>                                                                  |                                                                     |
| <i>Multiple peri-pancreatic fluid collections and sub-capsular liver collection(M)</i>   | <i>Significant contribution to diagnosis</i>                        |
| <b>Pelvis n=30 (12.0)</b>                                                                |                                                                     |
| <b>Lung Cancer n=7</b>                                                                   |                                                                     |
| <b>Adenocarcinoma n=4</b>                                                                |                                                                     |
| <i>Sacral bony metastases (M)</i>                                                        | <i>Up-staging of disease</i>                                        |
| <i>Iliac lymphadenopathy and pelvic bony metastases (M)</i>                              | <i>Up-staging of disease</i>                                        |
| <i>Ilium bony metastases (F)</i>                                                         | <i>Up-staging of disease</i>                                        |
| <i>Malignant ascites and suspicion of malignancy extending inferior to diaphragm (M)</i> | <i>Up-staging of disease</i>                                        |
| <b>Squamous Cell n=3</b>                                                                 |                                                                     |
| <i>Pelvic and inguinal lymphadenopathies (M)</i>                                         | <i>Up-staging of disease and alternative convenient biopsy site</i> |
| <i>Sacral bony metastases (F)</i>                                                        | <i>Up-staging of disease</i>                                        |
| <i>Ilium bony metastases (M)</i>                                                         | <i>Up-staging of disease</i>                                        |
| <b>Ovarian n=11</b>                                                                      |                                                                     |
| <i>Ovarian mass and soft tissue nodules throughout peritoneum(F)</i>                     | <i>Identification of primary tumour</i>                             |
| <i>Ovarian Mass, omental thickening and ascites(F)</i>                                   | <i>Identification of primary tumour</i>                             |
| <i>Retro-peritoneal and pre-sacral lymphadenopathies(F)</i>                              | <i>Upstaging of disease</i>                                         |
| <i>Ovarian mass, peritoneal thickening and ascites(F)</i>                                | <i>Identification of primary tumour</i>                             |
| <i>Peritoneal nodules and ascites(F)</i>                                                 | <i>Significant contribution to diagnosis of primary tumour</i>      |
| <i>Ovarian mass(F)</i>                                                                   | <i>Identification of primary tumour</i>                             |
| <i>Ovarian mass(F)</i>                                                                   | <i>Identification of primary tumour</i>                             |
| <i>Ovarian mass(F)</i>                                                                   | <i>Identification of primary tumour</i>                             |
| <i>Ovarian mass(F)</i>                                                                   | <i>Identification of primary tumour</i>                             |
| <i>Ovarian mass(F)</i>                                                                   | <i>Identification of primary tumour</i>                             |
| <i>Ascites(F)</i>                                                                        | <i>Significant contribution to diagnosis of primary tumour</i>      |
| <i>Diffuse omental disease(F)</i>                                                        | <i>Significant contribution to diagnosis of primary tumour</i>      |
| <b>Haematological Cancer n=4</b>                                                         |                                                                     |
| <i>Small bowel thickening and peritoneal thickening (M) – Burketts lymphoma</i>          | <i>Identification of primary tumour</i>                             |
| <i>Pelvic and inguinal lymphadenopathies (M) CLL</i>                                     | <i>Up-staging of disease and alternative convenient biopsy site</i> |
| <i>Iliopsoas muscle and hemi-pelvis bony infiltration (F) (lymphoblastic lymphoma)</i>   | <i>Up-staging of disease</i>                                        |
| <i>Pelvic and inguinal lymphadenopathies(F) (follicular lymphoma)</i>                    | <i>Up-staging of disease and alternative convenient biopsy site</i> |
| <b>Breast Cancer n=1</b>                                                                 |                                                                     |
| <i>Pelvic bony metastases(F)</i>                                                         | <i>Up-staging of disease</i>                                        |
| <b>Colon Cancer n=1</b>                                                                  |                                                                     |
| <i>Dilated and fluid-filled appendix (M)</i>                                             | <i>Identification of primary tumour</i>                             |
| <b>Malignant Melanoma n=1</b>                                                            |                                                                     |

|                                                                                                            |                                                                             |
|------------------------------------------------------------------------------------------------------------|-----------------------------------------------------------------------------|
| <i>Soft tissue metastases adjacent to iliac wing (M)</i>                                                   | <i>Up-staging of disease</i>                                                |
| <b>Prostate Cancer n=1</b>                                                                                 |                                                                             |
| <i>Para-aortic lymphadenopathy causing thoracic duct obstruction (M)</i>                                   | <i>Identification of cause of thoracic duct obstruction</i>                 |
| <b>Primary Peritoneal Cancer n=1</b>                                                                       |                                                                             |
| <i>Peritoneal Nodularity(F)</i>                                                                            | <i>Identification of primary tumour</i>                                     |
| <b>Tuberculosis n=1</b>                                                                                    |                                                                             |
| <i>Inferior vena cava thrombosis (M)</i>                                                                   | <i>Actionable related finding</i>                                           |
| <b>Chronic Kidney Disease n=1</b>                                                                          |                                                                             |
| <i>Bilateral obstructed and dilated ureters and renal pelvises with fluid overload of soft tissues (M)</i> | <i>Significant contribution to diagnosis and actionable related finding</i> |
