# Supplementary material
Source: HighWire-hosted journal article supplement (https://thorax.bmj.com/content/75/6/503)
Supplement: inline-supplementary-material-3 [file inline-supplementary-material-3.pdf]

**Appendix 3. Summary of multinomial logistic regression of possible predictive factors for clinically significant findings found in the abdomen and pelvis.**

|                                | Significant Findings by CT cut-off |                  |                     |         |                  |                     |         |
|--------------------------------|------------------------------------|------------------|---------------------|---------|------------------|---------------------|---------|
|                                | No Extra-thoracic Findings         | Abdomen          | Odds-ratio (95% CI) | p-value | Pelvis           | Odds-ratio (95% CI) | p-value |
| <b>Total (n=249)</b>           | <b>190 (76.3)</b>                  | <b>29 (11.6)</b> |                     |         | <b>30 (12.0)</b> |                     |         |
| <b>Age (range)</b>             | 73 (26-95)                         | 70 (45-89)       | 0.98 (0.95-1.01)    | 0.193   | 71 (33-90)       | 0.97(0.95-1.01)     | 0.137   |
| <b>Sex (%)</b>                 |                                    |                  |                     |         |                  |                     |         |
| Male (167)                     | 135 (80.8)                         | 20 (12.0)        | 0.74 (0.29-1.87)    | 0.788   | 12 (7.2)         | 2.73 (1.12-6.69)    | 0.034*  |
| Female (82)                    | 55 (67.1)                          | 9 (11.0)         |                     |         | 18 (22.0)        |                     |         |
| <b>Effusion Side (%)</b>       |                                    |                  |                     |         |                  |                     |         |
| Right (147)                    | 113 (76.9)                         | 17 (11.6)        | 1.00 (0.44-2.23)    | 0.978   | 17 (11.6)        | 1.14 (0.50-2.55)    | 0.768   |
| Left (102)                     | 77 (75.5)                          | 12 (11.8)        |                     |         | 13 (12.7)        |                     |         |
| <b>Previous Malignancy (%)</b> |                                    |                  |                     |         |                  |                     |         |
| Yes (44)                       | 31 (70.5)                          | 6 (13.6)         | 0.82 (0.31-2.21)    | 0.659   | 7 (15.9)         | 0.87 (0.33-2.25)    | 0.710   |
| No (205)                       | 159 (77.6)                         | 23 (11.2)        |                     |         | 23 (11.2)        |                     |         |
| <b>Asbestos Exposure (%)</b>   |                                    |                  |                     |         |                  |                     |         |
| Yes (87)                       | 77 (88.5)                          | 7 (8.0)          | 1.96 (0.74-5.18)    | 0.118   | 3 (3.4)          | 3.39 (1.00-12.67)   | 0.050   |
| No (162)                       | 113 (69.8)                         | 22 (13.6)        |                     |         | 27 (16.7)        |                     |         |

(\*p-value <0.05)
